# Supplementary material for: A colorimetric paper-based immunosensor for high-sensitivity C-reactive protein (hs-CRP) detection
Source: Royal Society of Chemistry journal article supplement (doi:10.1039/d5ay01911g), 2026-01-01
Supplement: d5ay01911g1.pdf [file d5ay01911g1.pdf]

## Supplementary Information

### **Colorimetric Paper-Based Immunosensor for High-Sensitivity C-Reactive Protein (hs-CRP) Detection**

D. Lawanstien<sup>a</sup>, Pakakan Ngernpradab<sup>a</sup> and M. Srisa-Art <sup>a,\*</sup>

<sup>a</sup>Electrochemistry and Optical Spectroscopy Center of Excellence, Department of Chemistry, Faculty of Science, Chulalongkorn University, Bangkok 10330, Thailand

\*e-mail: [monpichar.s@chula.ac.th](mailto:monpichar.s@chula.ac.th)

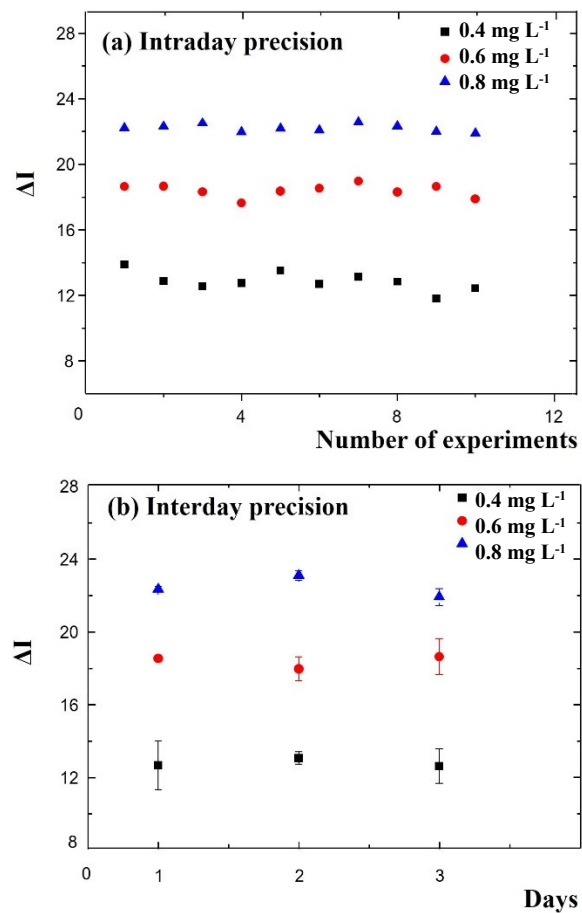

**Fig. S1** Intrainday (a) and interday (b) precisions for the detection of CRP at three concentration levels including 0.4, 0.6 and 0.8 mg mL<sup>-1</sup>. The corresponding raw data are provided in **Table S1a** and **S1b**.

**Table S1** Original data of **Fig. S1(a)** (Intraday precision)

| <b>Replicate</b> | <b><math>\Delta I</math></b> |                              |                              |
|------------------|------------------------------|------------------------------|------------------------------|
|                  | <b>0.4 mg L<sup>-1</sup></b> | <b>0.6 mg L<sup>-1</sup></b> | <b>0.8 mg L<sup>-1</sup></b> |
| 1                | 13.88                        | 18.64                        | 22.22                        |
| 2                | 12.87                        | 18.65                        | 22.31                        |
| 3                | 12.56                        | 18.32                        | 22.50                        |
| 4                | 12.74                        | 17.64                        | 21.96                        |
| 5                | 13.52                        | 18.36                        | 22.20                        |
| 6                | 12.70                        | 18.54                        | 22.09                        |
| 7                | 13.13                        | 18.96                        | 22.59                        |
| 8                | 12.84                        | 18.31                        | 22.33                        |
| 9                | 11.80                        | 18.65                        | 22.00                        |
| 10               | 12.43                        | 17.88                        | 21.88                        |
| <b>Average</b>   | <b>12.85</b>                 | <b>18.39</b>                 | <b>22.21</b>                 |
| <b>SD</b>        | <b>0.58</b>                  | <b>0.39</b>                  | <b>0.23</b>                  |
| <b>%RSD</b>      | <b>4.48</b>                  | <b>2.13</b>                  | <b>1.04</b>                  |

**Table S2** Original data of **Fig. S1(b)** (Interday precision)

| <b>Day</b>     | <b><math>\Delta I</math></b> |                              |                              |
|----------------|------------------------------|------------------------------|------------------------------|
|                | <b>0.4 mg L<sup>-1</sup></b> | <b>0.6 mg L<sup>-1</sup></b> | <b>0.8 mg L<sup>-1</sup></b> |
| 1              | 12.67                        | 18.78                        | 22.22                        |
| 2              | 13.01                        | 18.00                        | 23.11                        |
| 3              | 12.56                        | 18.67                        | 22.0                         |
| <b>Average</b> | <b>12.75</b>                 | <b>18.48</b>                 | <b>22.44</b>                 |
| <b>SD</b>      | <b>0.23</b>                  | <b>0.42</b>                  | <b>0.59</b>                  |
| <b>%RSD</b>    | <b>1.84</b>                  | <b>2.28</b>                  | <b>2.62</b>                  |

**Table S3** Original data for determination of CRP in human serum (Section 3.4)

| Replicate | $\Delta I$     | CRP (mg L <sup>-1</sup> ) |
|-----------|----------------|---------------------------|
| 1         | 21.96          | 40.66                     |
| 2         | 22.50          | 42.04                     |
| 3         | 22.53          | 42.10                     |
| 4         | 23.08          | 43.52                     |
| 5         | 2.35           | 41.66                     |
| 6         | 22.13          | 41.08                     |
| 7         | 21.99          | 40.74                     |
|           | <b>Average</b> | 41.7                      |
|           | <b>SD</b>      | 1.0                       |
|           | <b>%RSD</b>    | 2.4                       |

**Table S4** Statistical analysis (t-test) for comparison between the obtained value and the true value.

| <b>t-test: Paired Two Sample for Means</b> |                        |                        |
|--------------------------------------------|------------------------|------------------------|
|                                            | Variable 1             | Variable 2             |
| Mean                                       | 41.7                   | 41.2                   |
| Variance                                   | 0.997665               | $5.89 \times 10^{-29}$ |
| Observations                               | 7                      | 7                      |
| Pearson Correlation                        | $6.59 \times 10^{-15}$ |                        |
| Hypothesized Mean Difference               | 0                      |                        |
| df                                         | 6                      |                        |
| t stat                                     | 1.291586               |                        |
| P(T<=t) one-tail                           | 0.12201                |                        |
| t Critical one-tail                        | 1.94318                |                        |
| P(<=t) two-tail                            | 0.244021               |                        |
| t Critical two-tail                        | 2.446912               |                        |
